# Supplementary material
Source: PubMed Central journal article supplement (PMC6221210)
Supplement: tpmd180277.SD1.pdf [file tpmd180277.SD1.pdf]

The following are supplemental materials and will be published online only

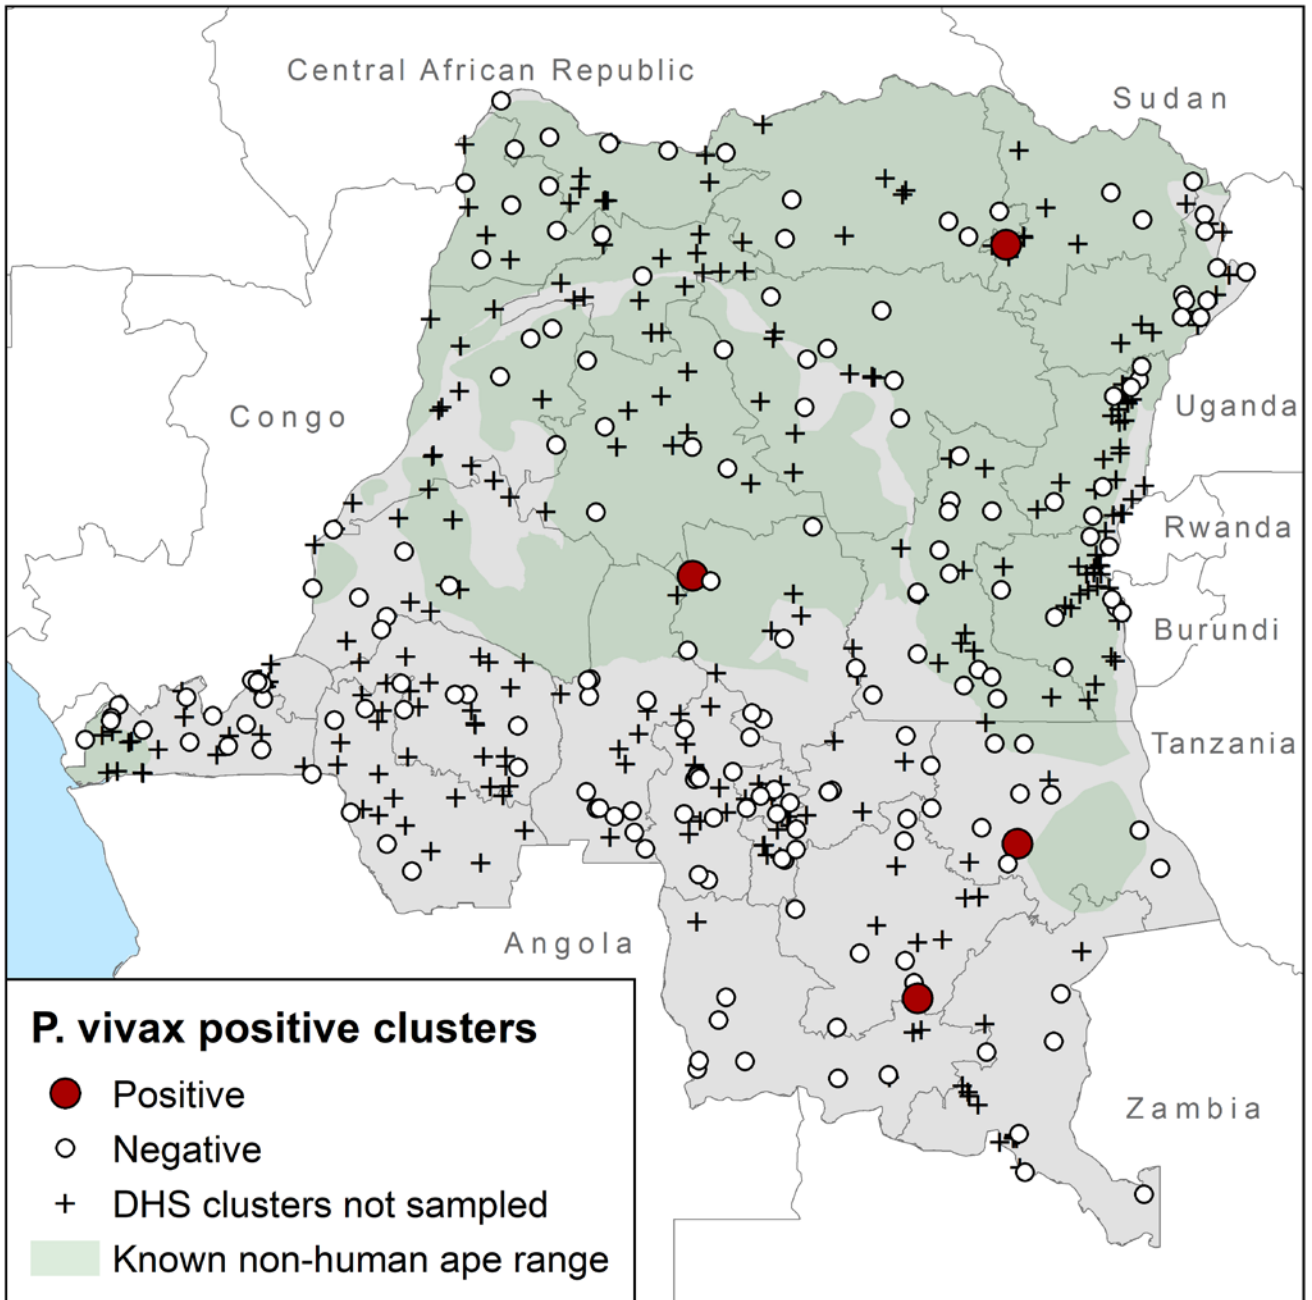

**Supplemental Figure 1:** Map of the Democratic Republic of the Congo with known non-human ape range (green), clusters not selected in the screen (black), clusters that screened positive for *P. vivax* (red), and clusters that screened negative for *P. vivax* (white). Shapefiles for the Democratic Republic of the Congo were downloaded from the Database of Global Administrative Areas (<http://www.gadm.org/>) and plotted with ArcGIS (version 10.4.1). The non-human ape boundaries were defined by data from the International Union for Conservation of Nature (<http://www.iucnredlist.org/>).

| Ref.                                   | Primer                | Sequence                                       | Recipe                                                                                                                                                                    | Thermocycler Conditions                                                                                                                            |
|----------------------------------------|-----------------------|------------------------------------------------|---------------------------------------------------------------------------------------------------------------------------------------------------------------------------|----------------------------------------------------------------------------------------------------------------------------------------------------|
| Singh <i>et al.</i> 1999 <sup>29</sup> | rPLU 1                | 5' –<br>TCAAAGATTA<br>AGCCATGCAA<br>GTGA       | <b>Round 1</b><br>1. 12.5 µL of HotStarTaq Master Mix (Qiagen©, Venlo, Netherlands)<br>2. 400 nM of forward and reverse primer<br>3. 5 µL of template DNA                 | 1. 95°C for 15 minutes<br>2. 35 cycles of 94°C for 1 minute, 50°C for 1 minute, and 72°C for 1 minute<br>3. Final extension of 72°C for 10 minutes |
|                                        | rPLU 5                | 5' –<br>CCTGTTGTTGC<br>CTTAAACTCC              |                                                                                                                                                                           |                                                                                                                                                    |
|                                        | rViv 1                | 5' –<br>CGCTTCTAGCT<br>TAATCCACAT<br>AACTGATAC | <b>Round 2</b><br>1. 12.5 µL of HotStarTaq Master Mix (Qiagen©, Venlo, Netherlands)<br>2. 400 nM of forward and reverse primer<br>3. 1 µL of round-1 PCR product          |                                                                                                                                                    |
|                                        | rViv 2                | 5' –<br>ACTTCCAAGC<br>CGAAGCAAAG<br>AAAGTCCTTA |                                                                                                                                                                           |                                                                                                                                                    |
| Veron <i>et al.</i> 2009 <sup>30</sup> | Pv-1                  | 5' –<br>CGCTTCTAGCT<br>TAATCCACAT<br>TAACTG    | 1. 12.5 µL of FastStart Universal Probe (Roche©, Indianapolis, IN)<br>2. 1000 nM of forward and reverse primer<br>3. 200 nM Pv-probe (VIC-MGB)<br>4. 2 µL of template DNA | 1. 95°C for 10 min<br>2. 40 cycles of 95°C for 15 sec<br>3. 60°C for 1 minute                                                                      |
|                                        | Pv-2                  | 5' –<br>AATTTACTCA<br>AAGTAACAAG<br>GACTTCCAAG |                                                                                                                                                                           |                                                                                                                                                    |
|                                        | Pv-probe (VIC-MGB)    | 5' –<br>CGCATTTTGCT<br>ATTATGT                 |                                                                                                                                                                           |                                                                                                                                                    |
| Ménard <i>et al.</i> 2010 <sup>6</sup> | Duffy Outer Forward * | 5' –<br>GTGGGGTAAG<br>GCTTCCTGAT               | <b>Round 1</b><br>1. 400 nM of each primer<br>2. 0.25 µL of FastStart High Fidelity Taq (Enzyme Blend; Roche©,                                                            | 1. 95°C for 2 min<br>2. 40 cycles of 95°C for 30 seconds, 64°C for 30 seconds, and 72°C for 5 minutes                                              |
|                                        | Duffy Outer Reverse   | 5' –<br>CAGAGCTGCG<br>AGTGCTACCT               |                                                                                                                                                                           |                                                                                                                                                    |

|  |                       |                                  |                                                                                                                                                                                                                                                                                                    |                                                                                                                                                   |
|--|-----------------------|----------------------------------|----------------------------------------------------------------------------------------------------------------------------------------------------------------------------------------------------------------------------------------------------------------------------------------------------|---------------------------------------------------------------------------------------------------------------------------------------------------|
|  |                       |                                  | Indianapolis, IN)<br>3. 2.5 µL of 10x FastStart High Fidelity reaction buffer with 18 mM MgCl <sub>2</sub><br>4. 250 µM of dNTPs<br>5. 3µL of template DNA                                                                                                                                         | 3. Final extension of 72°C for 5 minutes                                                                                                          |
|  | Duffy Outer Forward * | 5' –<br>GTGGGGTAAG<br>GCTTCCTGAT | <b>Round 2</b><br>1. 360 nM of each primer<br>2. 0.25 µL of FastStart High Fidelity Taq (Enzyme Blend; Roche, Indianapolis, IN)<br>3. 2.5 µL of 10x FastStart High Fidelity Reaction Buffer, 1 mM of MgCl <sub>2</sub><br>4. 250 µM of dNTPs<br>5. 3 µL of first-round PCR product as the template | 1. 95°C for 2 min<br>2. 40 cycles of 95°C for 30 seconds, 61°C for 30 seconds, and 72°C for 5 minutes<br>3. Final extension of 72°C for 5 minutes |
|  | Duffy GATA1 Reverse   | 5' –<br>CAAACAGCAG<br>GGGAAATGAG |                                                                                                                                                                                                                                                                                                    |                                                                                                                                                   |

**Supplemental Table 1:** The adapted protocols used for diagnostic PCR, confirmatory qPCR, and Duffy-genotyping with associated PCR recipes and thermocycler conditions. \*Hemi-nested PCR protocol (same primer).

| Sample | Sequence                                                                        |
|--------|---------------------------------------------------------------------------------|
| D9U3K  | CTTTGTGCGCATTGCTATTATGTGTTCTTTAATTAAAATGATTCTTTTAAGGACTTTCTTTGCTTCGGCTTGGAAGTAA |
| I4G3V  | TTTGTGCGCATTGCTATTATGTGTTCTTTAATTAAAATGATTCTTTTAAGGACTTTCTTTGCTTCGGCTTGGA       |
| N4M7L  | TTTGTGCGCATTGCTATTATGTGTTCTTTAATTAAAATGATTCTTTTAAGGACTTTCTTTGCTTCGGCTTGGA       |
| Q8J6O  | TTGTGCGCATTGCTATTATGTGTTCTTTAATTAAAATGATTCTTTTAAGGACTTTCTTTGCTTCGGCTTGGA        |
| O6Y4X  | TGCTATTATGTGTTCTTTAATTAAAATGATTCTTTTAAGGACTTTCTTTGCTTC                          |
| M2B5U  | ATTATGTGTTCTTTAATTAAAATGATTCTTTTAAGGACTTTCTTTGCTTCGG                            |
| P8A6E  | TTATGTGTTCTTTAATTAAAATGATTCTTTTAAGGACTTTCTTTGCTTCGGCTTGGA                       |
| X3M5S  | TTATGTGTTCTTTAATTAAAATGATTCTTTTAAGGACTTTCTTTGCTTCGGCTTGGA                       |
| B5A7N  | TTATGTGTTCTTTAATTAAAATGATTCTTTTAAGGACTTTCTTTGCTTCGGCTTGGAAGTA                   |
| Z6W9M  | TTAATTAAAATGATTCTTTTAAGGACTTTCTTTGCTTCGGCTTGGA                                  |
| J6V8T  | AATTAAAATGATTCCTTTTAAGGACTT                                                     |
| T6B8J  | TTTAAGGACTTTCTTTGCTTCGGCTTGGA                                                   |

**Supplemental Table 2:** Sanger sequences for the *P. vivax* 18s rRNA gene by sample. The ends of the sequences were trimmed for low quality bases using the default settings in Geneious® 10.1.3 (Biomatters Limited, Auckland, New Zealand).
